# Supplementary material
Source: publisher site journal article supplement (https://www.dovepress.com/article/230286)
Supplement: Supplementary file 1 [file get_supplementary_file.php]

**Additional File 1: Q-set Statements**

**A. CONSEQENTIALISM**

**1. Recipient**

42- Organ donation is acceptable if there is large health benefit to recipient (example, heart or liver transplantation to sustain recipient’s life).

**Acceptable if benefit to recipient large**

40- Organ donation is acceptable if there is moderate health benefit to recipient (example, kidney transplantation to relieve recipient from dialysis).

**Acceptable with moderate benefit to recipient**

29- Organ donation is acceptable if there is small health benefit to recipient (example, pancreatic transplantation to relieve recipient from insulin injections).

**Acceptable with small benefit to recipient**

**-----------------------------------**

**2. Donor**

37- Organ donation is acceptable if there is large social benefit to donor.

**Acceptable if social benefit to donor large**

36- Organ donation is acceptable if there is moderate social benefit to donor.

**Acceptable with moderate social benefit to donor**

22- Organ donation is acceptable if there is small social benefit to donor.

**Acceptable with small social benefit to donor**

**------------**

2- Organ donation is acceptable if risk of harm to donor is relatively small (example, donation after death).

**Acceptable if harm to donor small**

38- Organ donation is acceptable if risk of harm to donor is relatively moderate (example, donation of one kidney during life).

**Acceptable with moderate harm to donor**

32- Organ donation is acceptable if risk of harm to donor is relatively large (example, partial liver donation during life).

**Acceptable with large harm to donor**

**----------------------------------**

**3. Common good**

12- Organ donation is acceptable if there is large benefit to community (such as higher productivity or lower health cost).

**Acceptable if benefit to community large**

15- Organ donation is acceptable if there is moderate benefit to community (such as higher productivity or lower health cost).

**Acceptable with moderate benefit to community**

39- Organ donation is acceptable if there is small benefit to community (such as higher productivity or lower health cost).

**Acceptable with small benefit to community**

**------------------------------------**

**4. Ethics of care**

41- Organ donation is acceptable if there is large health benefit to donor’s family (example, the family has priority to receive any organ or multiple organs).

**Acceptable if health benefit to donor family large**

9- Organ donation is acceptable if there is moderate health benefit to donor’s family (example, the family has priority to receive a single similar organ).

**Acceptable with moderate health benefit to donor family**

35- Organ donation is acceptable if there is social benefit to donor’s family (example, the family receives certificate of appreciation).

**Acceptable with social benefit to donor family**

-------------

23- Organ donation is acceptable if there is no harm to donor family.

**Acceptable if no harm to donor family**

28- Organ donation is acceptable if risk of harm to donor family is small (example, donation precludes further organ donation to family members).

**Acceptable if harm to donor family small**

24- Organ donation is acceptable if risk of harm to donor family is moderate (example, donation may affect income, employment, insurance, etc.).

**Acceptable with moderate harm to donor family**

**------------**

25- Organ donation is acceptable if the organ is directed to a family member.

**Acceptable if directed to family member**

7- Organ donation is acceptable if the organ is directed to a friend.

**Acceptable if directed to friend**

5- Organ donation is acceptable if the organ is directed to people of the same religion.

**Acceptable if directed to same-religion people**

6- Organ donation is acceptable if the organ is directed to people of the same State.

**Acceptable if directed to same-State people**

19- Organ donation is acceptable if the organ is directed to people of the same race.

**Acceptable if directed to same-race people**

**----------------------------------------------------------------------------------------------------------------**

**B. JUSTICE**

13- Organ donation is acceptable if there is equitable distribution of organs to potential recipients.

**Acceptable if organ distribution equitable**

34- Organ donation is acceptable if State covers cost.

**Acceptable if State covers cost**

10- Organ donation is acceptable if recipient covers cost.

**Acceptable if recipient covers cost**

1- Organ donation is acceptable if there is State policy that equitably requires people to donate after death.

**Acceptable if equitably State-forced after death**

**---------------------------------------------------------------------------------------------------**

**C. RIGHTS**

20- Both explicit consent of donor AND explicit approval of donor’s family are required if organ removal takes place while the donor is alive.

**Explicit donor consent and family approval for live donation**

3- Both explicit consent of donor AND explicit approval of donor’s family after donor’s death are required if organ removal is after death.

**Explicit donor consent and family approval for postmortem donation**

21- Only explicit consent of donor is required if organ removal is after death.

**Only explicit donor consent for postmortem donation**

18- Organ removal after death is acceptable as long as donor objection is not known AND his/her family approves.

**Only donor no-known objection & family approval for postmortem donation**

16- Only family approval is required if organ removal is after death.

**Only donor family approval for postpartum donation**

33- Organ removal after death is acceptable as long as donor’s objection is not known EVEN if his/her family doesn’t approve.

**Only donor no-known objection for postmortem donation**

14- No need for donor consent OR donor’s family approval if organ removal is after death.

**Donor consent and family approval not required for postmortem donation**

**-----------------------------------------------------------------------------------------------------------**

**4. VIRTUE**

8- Organ donation is acceptable if motivation is purely moral.

**Acceptable if motivation purely moral**

4- Organ donation is acceptable if moral motivation is stronger than materialistic motivation.

**Acceptable if moral motivation stronger than materialistic**

30- Organ donation is acceptable if materialistic motivation is stronger than moral motivation.

**Acceptable with materialistic motivation stronger than moral**

27- Organ donation is acceptable if motivation is purely materialistic.

**Acceptable with purely materialistic motivation**

**-----------**

17- Organ donation is acceptable if donor does not mandate materialistic benefit for him/her self.

**Acceptable if donor doesn’t mandate materialistic self-benefit**

26- Organ donation is acceptable if donor mandates small materialistic benefit for him/her self.

**Acceptable with donor mandating small materialistic self-benefit**

11- Organ donation is acceptable if donor mandates moderate materialistic benefit for him/her self.

**Acceptable with donor mandating moderate materialistic self-benefit**

31- Organ donation is acceptable if donor mandates large materialistic benefit for him/her self.

**Acceptable with donor mandating large materialistic self-benefit**

**Additional File 2, Instructions and Sorting Sheet**

**Instructions to sorters**

Please read the following instructions carefully before you start your sort. It is very important that the sorting procedure be followed in all its details.

We ask you to indicate the degree of your agreement or disagreement with each of the statements in the deck of cards that was given to you. The 42 cards in the deck contain statements about issues related to the ethical acceptability of organ donation. We ask you to rank-order these statements according to your own point of view, using the attached Q-grid and Q-sorting sheet. The numbers on the cards (1 to 42) have been assigned randomly to the cards. They are used only to help you indicate your response.

Just to be clear, we are interested in your own point of view. Therefore, there is no right or wrong answer. We want to know what you think is most agreeable and what you think is most disagreeable, based on your own values and beliefs. We are interested in your personal view, your view as an individual rather than your view as part of an organization, profession, or society. Laws and rules sometimes justifiably prohibit conducts that is morally justifiable in individual cases. We are interested in your opinion at the level of general policy rather than the level of individual acts.

Your response will be treated as highly confidential and will be used only for the purpose of this study. It will not be linked to your medical record or used to inform your medical management.

Read through all the statements carefully to get a general impression of the range of issues at hand. You may notice that some of them are in agreement with your view, to a greater or lesser degree. Other statements may be in disagreement with your view, also to a greater or lesser degree. There are yet other statements that you may feel “neutral’ or ambivalent about. These possibly seem irrelevant to your own values and preferences.

Your task is to indicate the degree of agreement or disagreement with each statement. What is important to us is not *why* you consider a statement agreeable or disagreeable but *how* much you agree or disagree with it. The statements should be sorted in an order of agreeability from your personal point of view; those most agreeable should be scored the highest, while those most disagreeable should be scored the lowest.

First, divide the statements into three piles, most agreeable, most disagreeable, and “others”. Then look through the most agreeable pile and pick out the three statements that are most agreeable to you. Place them in the three boxes under number “9” in the Q-sort grid. It does not matter which one goes on top or in the middle. Now, look through the same pile again and pick out the four statements that you consider most agreeable to you (excluding from consideration those statements you have already put under number “9”). Place them in the four boxes under number “8” in the Q-sort grid. Now, of those statements that remain in the most agreeable pile, pick out five statements that you consider most agreeable to you (excluding from consideration those statements you have already put under numbers “9” and “8”). Place them in the five boxes under number “7” in the Q-sort grid.

Now work from the opposite end toward the middle. Of those statements in the most disagreeable pile, pick out the three statements that you consider most disagreeable to you. Place them in the three boxes under number “1” in the Q-sort grid. Now, look through the same pile again and pick out the four statements that you consider most disagreeable to you (excluding from consideration those statements that you have already put under number “1”). Place them in the four boxes under number “2” in the Q-sort grid. Now, of those statements that remain in the most disagreeable pile, choose the five statements that you consider most disagreeable to you. Place them in the five boxes under number “3” in the Q-sort grid.

Now, you have to sort out the remaining 18 statements in the “others” pile. Pick up the 6 statements that you consider agreeable to you. Place them in the six boxes under number “6” in the Q-sort grid. Pick up the 6 statements that you consider disagreeable to you. Place them in the six boxes under number “4” in the Q-sort grid. Pick up the 6 statements that are left in the pile, place them in the six boxes under number “5” in the Q-sort grid.

You may have difficulty in placing the required number of statements into each of the 9 categories. For example, if 6 statements are required for a category, you may find that you have too many or too few. In either event, finish with the required number of statements, either by eliminating those that can most sensibly be moved out or by moving in those statements that are most relevant. You may feel that some of your placements are forced. Your task may be admittedly an awkward one, but try to work through it anyway. Before finalizing your Q-sort, make sure your opinion is reflected on the Q-sort grid in front of you. Feel free to rearrange any statement, so that when you are done, the positions of the statements relative to each other reflect how you feel, as closely as it can be. When you are done, please write down the number of each card in the boxes of the Q-sorting sheet that correspond to the boxes of the Q-sort grid that you have placed the cards in. The Q-sorting sheet has the same arrangement as the Q-sort grid. We will collect your Q-sorting sheet to analyze it. After writing the numbers of all the cards in the corresponding boxes of the Q-sorting sheet, please explain/give us your comments why the three statements you have placed under number “9” are the most agreeable to you and why the three statements you have placed under number “1” are the most disagreeable to you (please use the attached sheet). This will help us understand your opinion.

We would like to emphasize that the worth of this research is heavily dependent on how well and conscientiously participating people perform their tasks. Sorting the statements as described above is perhaps tedious. But when honestly done, the results would be very useful. On the other hand, analysis of statements that have been haphazardly positioned or positioned without due considerations would lead to wrong conclusions. Therefore, we would like to request that you return the material to the study coordinator without your response, if for any reason you feel that you cannot, or prefer not to, perform the task in a meaningful manner.

Thank you for your cooperation.

**Q-sorting sheet**

Strongly disagree Strongly agree

| **1** | **2** | **3** | **4** | **5** | **6** | **7** | **8** | **9** |
| --- | --- | --- | --- | --- | --- | --- | --- | --- |
|  |  |  |  |  |  |  |  |  |
|  |  |  |  |  |  |  |  |  |
|  |  |  |  |  |  |  |  |  |
|  |  |  |  |  |  |  |  |  |
|  |  |  |  |  |  |  |  |  |
|  |  |  |  |  |  |  |  |

Please explain/comment why the three statements you have placed below number “9” are most agreeable to you.

Card #:____

_______________________________________________________________________

_______________________________________________________________________

Card #:____

_______________________________________________________________________

_______________________________________________________________________

Card #:____

_______________________________________________________________________

_______________________________________________________________________

Please explain/comment why the three statements you have placed below number “1” are most disagreeable to you.

Card #:____

_______________________________________________________________________

_______________________________________________________________________

Card #:____

_______________________________________________________________________

_______________________________________________________________________

Card #:____

_______________________________________________________________________

_____________________________________________________________________
